# Supplementary material
Source: PubMed Central journal article supplement (PMC4063271)
Supplement: stem0031-1511-SD5.pdf [file stem0031-1511-SD5.pdf]

Supplementary Table 1: Primers and Roche UPL probes used for qPCR

| <b>Gene</b> | <b>Forward primer</b>   | <b>Reverse primer</b> | <b>UPL Probe</b> |
|-------------|-------------------------|-----------------------|------------------|
| Cdh1        | ATCCTCGCCCTGCTGATT      | ACCACCGTTCTCCTCCGTA   | #18              |
| Esrrb       | CGATTCATGAAATGCCTCAA    | CCTCCTCGAACTCGGTCA    | #89              |
| Fgf5        | AAAACCTGGTGCACCCTAGA    | CATCACATTCCCGAATTAAGC | #29              |
| Gata2       | CACAAGATGAATGGACAGAACC  | ACAGGTGCCCGCTCTTCT    | #75              |
| Gata6       | GGTCTCTACAGCAAGATGAATGG | TGGCACAGGACAGTCCAAG   | #40              |
| Hes1        | ACACCGGACAAACCAAAGAC    | CGCCTCTTCTCCATGATAGG  | #99              |
| Mash1       | TCTCCTGGGAATGGACTTTG    | CGTTGGCGAGAAACACTAAAG | #74              |
| Nanog       | CCTCCAGCAGATGCAAGAA     | GCTTGCACTTCATCCTTTGG  | #25              |
| Oct4        | GTTGGAGAAGGTGGAACCAA    | CTCCTTCTGCAGGGCTTTC   | #95              |
| Pax7        | GGCACAGAGGACCAAGCTC     | GCACGCCGGTTACTGAAC    | #85              |
| Rex1        | CAGCTCCTGCACACAGAAGA    | ACTGATCCGCAAACACCTG   | #16              |
| Socs3       | CCTGCGCCTCAAGACCTTCA    | CGGCTCAGTACCAGCGGAAT  | not UPL          |
| Sox1        | GTGACATCTGCCCCATC       | GAGGCCAGTCTGGTGTGTCAG | #60              |
| Sox17       | GGTCTGAAGTGCGGTTGG      | TGTCTTCCCTGTCTTGGTTGA | #52              |
| Gscd        | GAGACGAAGTACCCAGACGTG   | GGCGGTTCTTAAACCAGACC  | #32              |
| TBP         | GGGGAGCTGTGATGTGAAGT    | CCAGGAAATAATTCTGGCTCA | #97              |
| T-Brachyury | CAGCCCACCTACTGGCTCTA    | GAGCCTGGGGTGATGGTA    | #100             |
| Twist1      | GAGCAACAGCGAGGAGGA      | CGACTGCTGCGTCTCTTG    | #66              |
| Wnt3a       | AATGGTCTCTCGGGAGTTTG    | CTTGAGGTGCATGTGACTGG  | #53              |
| Zfp521      | AAGCAAGCGAAACCGAGAT     | TTCTGGCCTCTTCTTGCAGT  | #16              |
