# Supplementary material
Source: PubMed Central journal article supplement (PMC4063271)

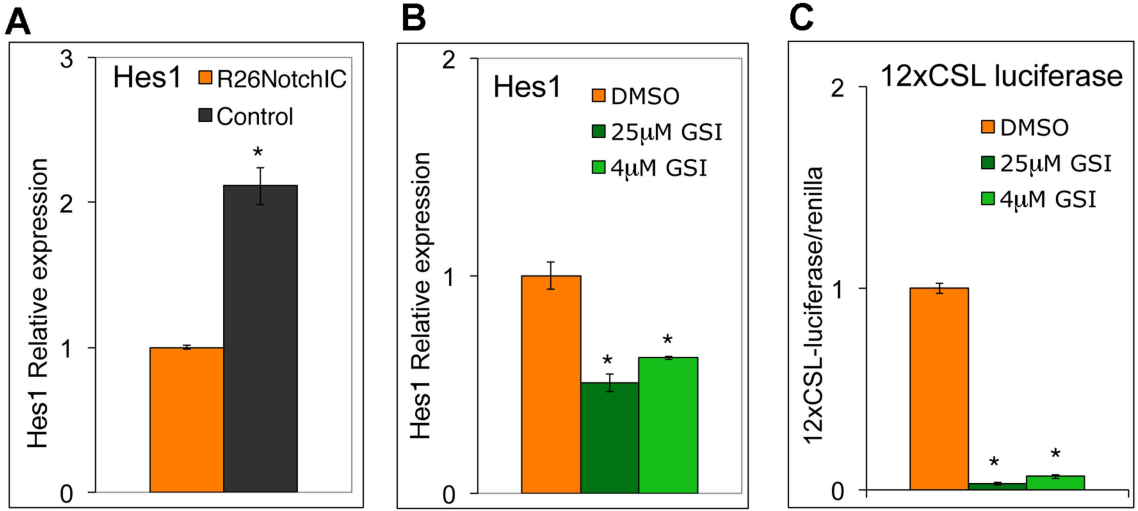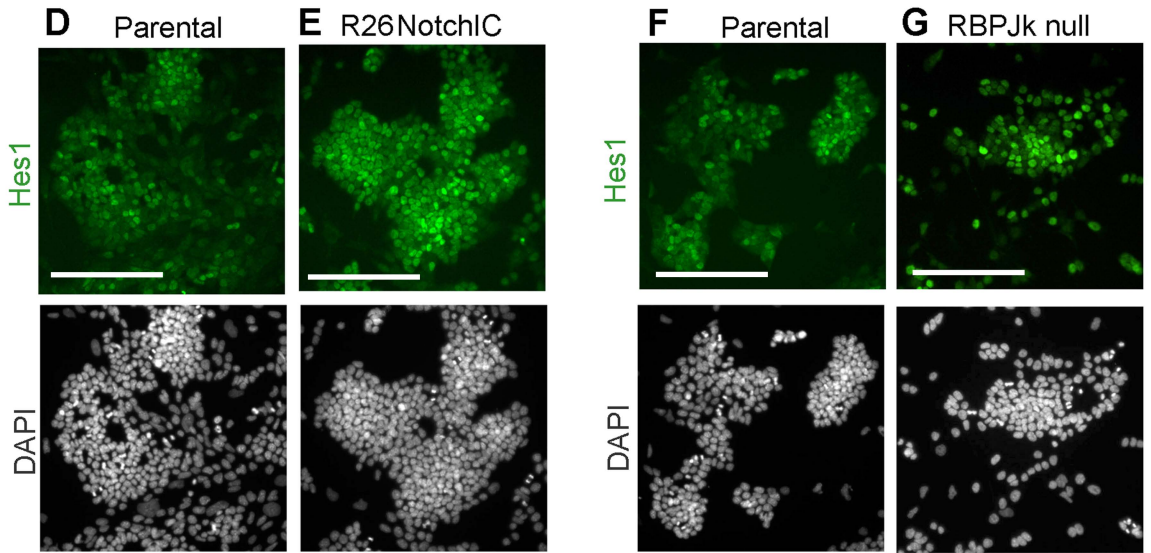

Supplement: stem0031-1511-SD1.pdf [file stem0031-1511-SD1.pdf]
